# Supplementary material for: A RET-supported logic gate combinatorial library to enable modeling and implementation of intelligent logic functions
Source: Royal Society of Chemistry journal article supplement (doi:10.1039/c5sc03570h), 2015-11-23
Supplement: c5sc03570h1.pdf [file c5sc03570h1.pdf]

## Electronic Supplementary Information

### A RET-Supported Logic Gate Combinatorial Library to Enable Modeling and Implementation of Intelligent Logic Functions

Ru-Ru Gao, Shuo Shi\*, Ying Zhu, Hai-Liang Huang, and Tian-Ming Yao\*<sup>[a]</sup>

Shanghai Key Laboratory of Chemical Assessment and Sustainability  
Department of Chemistry, Tongji University, Shanghai, 200092 (P.R. China)

Corresponding Author: [shishuo@tongji.edu.cn](mailto:shishuo@tongji.edu.cn); [tmyao@tongji.edu.cn](mailto:tmyao@tongji.edu.cn).

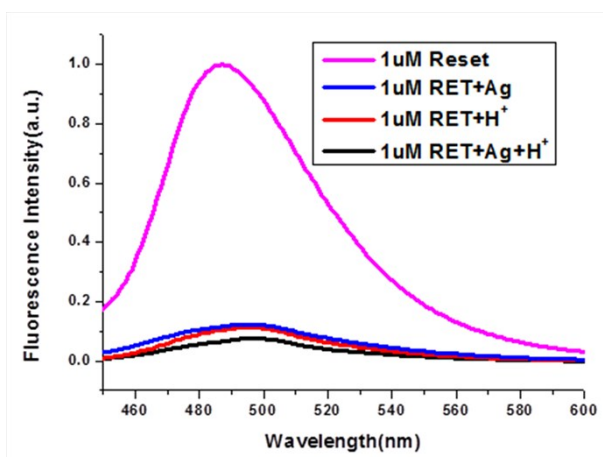

Figure S1. Fluorescent spectra of Reset system for NOR logic gate.

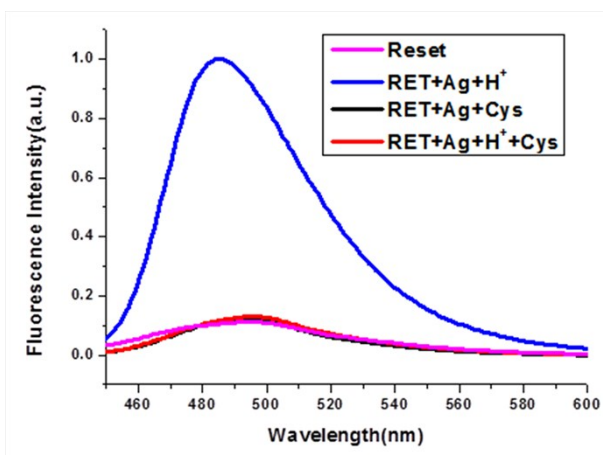

Figure S2. Fluorescent spectra of Reset system for INHIBIT logic gate.

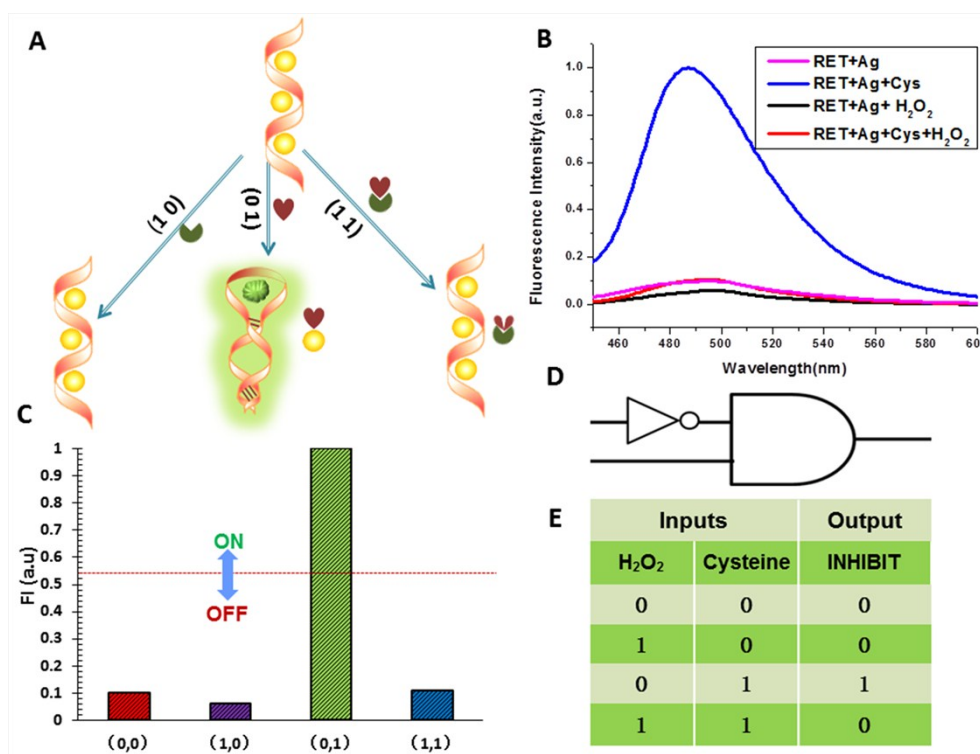

**Figure S3.** The "INHIBIT" logic gate. (A) Diagram of the operational design of the "INHIBIT" gate with employing silver deposited RET as the initial state and cysteine, H<sub>2</sub>O<sub>2</sub> as inputs; (B) fluorescent spectra of the INHIBIT gate with different combinations of the input; (C) Column diagram of the fluorescence intensities: The red dashed line shows the threshold (0.54); (D) Electronic equivalent circuitry; (E) Truth table of the INHIBIT gate.

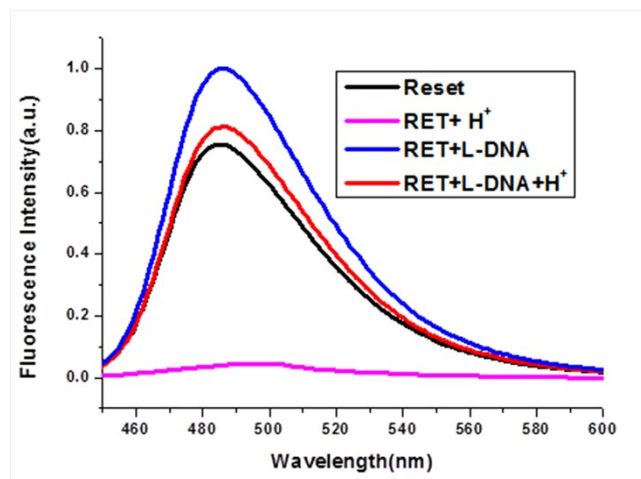

**Figure S4.** Fluorescent spectra of Reset system for IMPLICATION logic gate.

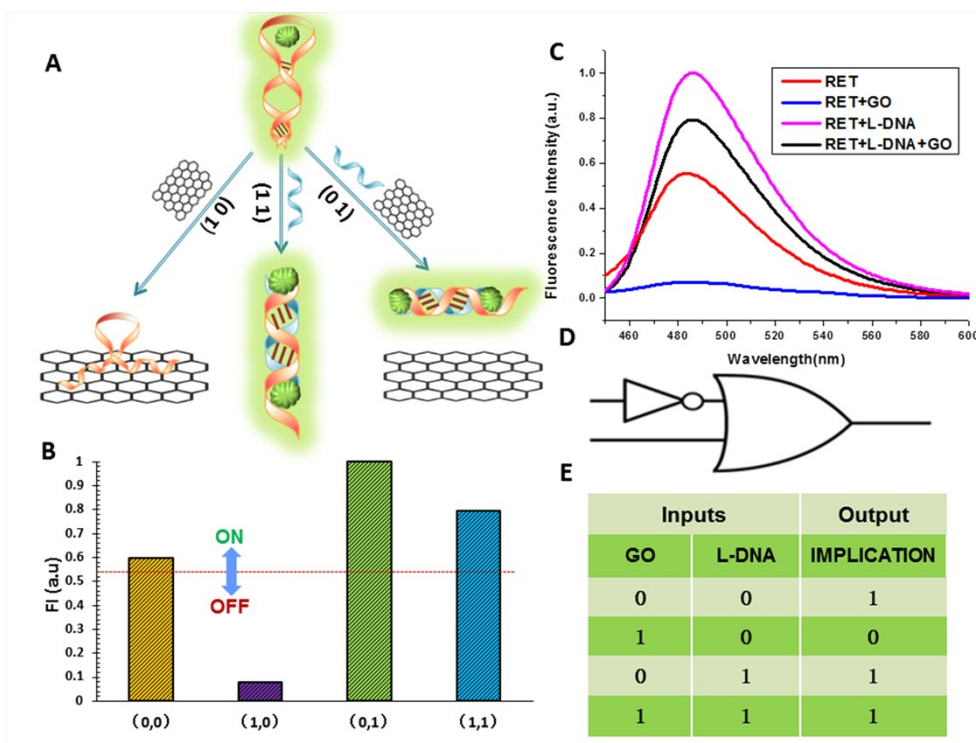

**Figure S5.** The "IMPLICATION" logic gate. (A) Diagram of the operational design of the "IMPLICATION" gate with employing RET as the initial state and GO, L-DNA as inputs; (B) fluorescent spectra of the IMPLICATION gate with different combinations of the inputs; (C) Column diagram of the fluorescence intensities: The red dashed line shows the threshold (0.54); (D) Electronic equivalent circuitry; (E) Truth table of the IMPLICATION gate.

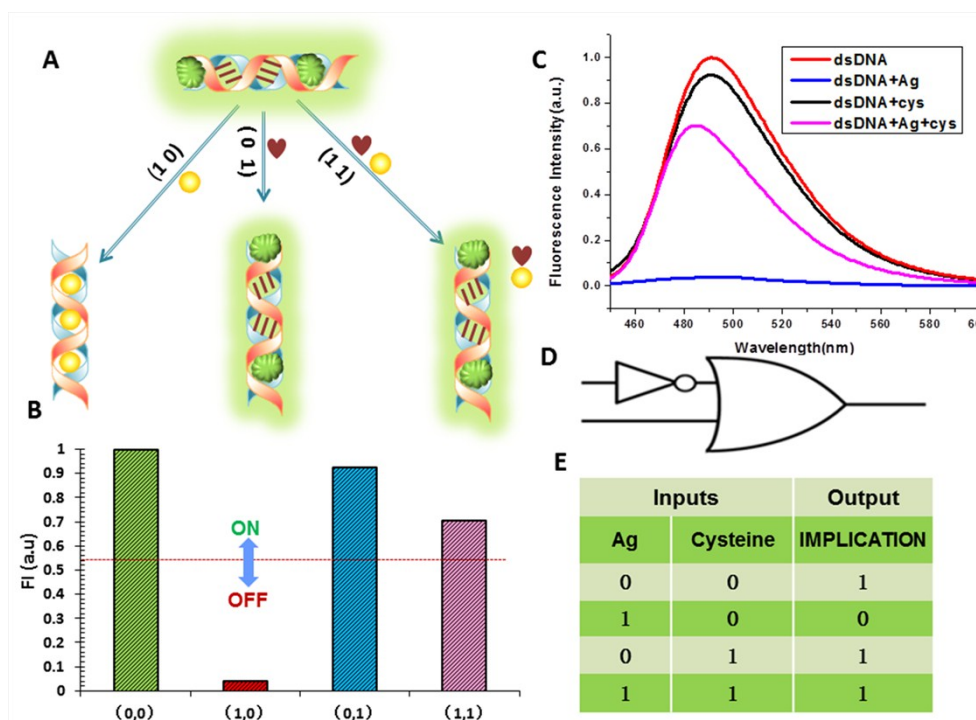

**Figure S6.** The "IMPLICATION" logic gate. (A) Diagram of the operational design of the "IMPLICATION" gate with employing dsDNA as the initial state and silver deposition, cysteine as inputs; (B) fluorescent spectra of the IMPLICATION gate with different combinations of the inputs; (C) Column diagram of the fluorescence intensities: The red dashed line shows the threshold (0.54); (D) Electronic equivalent circuitry; (E) Truth table of the IMPLICATION gate.

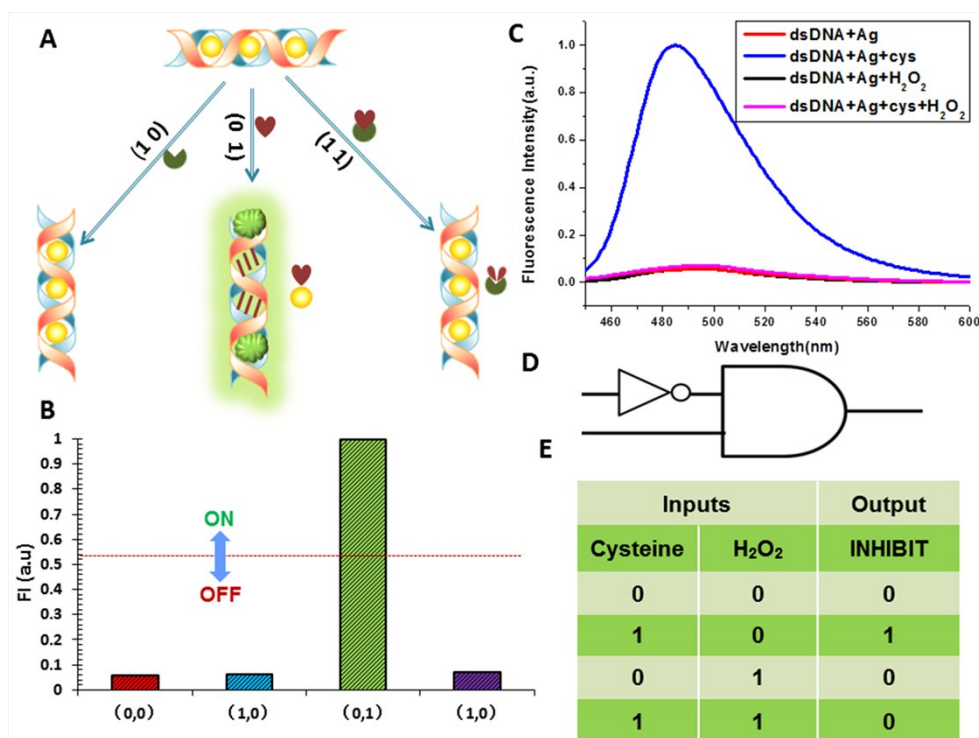

**Figure S7.** The “INHIBIT” logic gate. (A) Diagram of the operational design of the “INHIBIT” gate employed silver deposited dsDNA as the initial state and cysteine, H<sub>2</sub>O<sub>2</sub> as inputs; (B) fluorescent spectra of the INHIBIT gate with different combinations of the input; (C) Column diagram of the fluorescence intensities: The red dashed line shows the threshold (0.54); (D) Electronic equivalent circuitry; (E) Truth table of the INHIBIT gate.

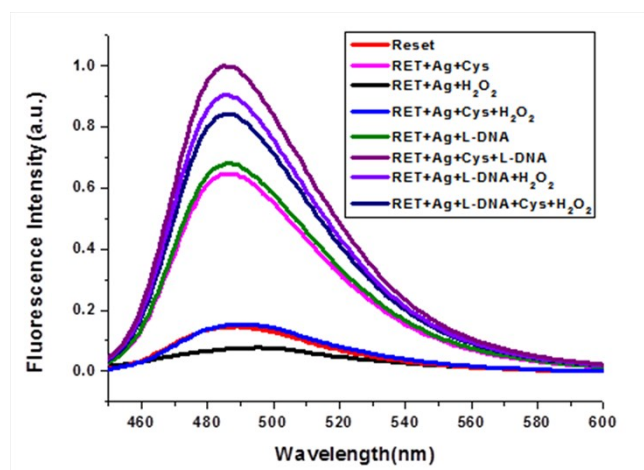

**Figure S8.** Fluorescent spectra of Reset system for the INHIBIT-OR gate.
